# Supplementary material
Source: PubMed Central journal article supplement (PMC3592166)
Supplement: JVI.02368-12_zjv999097379so1.pdf [file JVI.02368-12_zjv999097379so1.pdf]

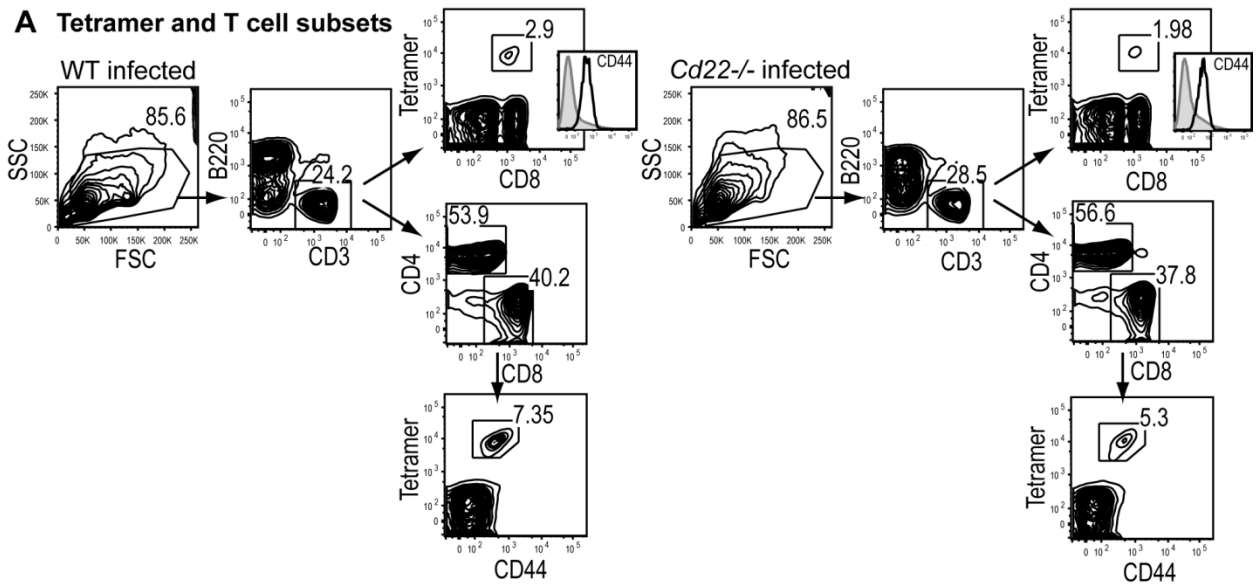

**B CD8 ICS: NS4B peptide stimulated**  
IFN $\gamma$ , TNF $\alpha$

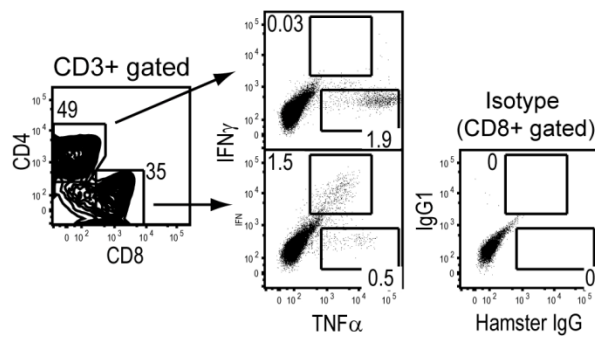

**C CD8 ICS: NS4B peptide stimulated**  
Perforin

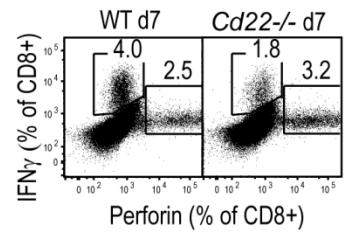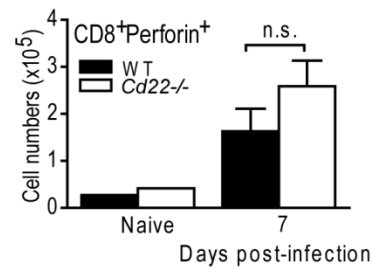

**D CD4 ICS: NS3 peptide stimulated**  
IFN $\gamma$

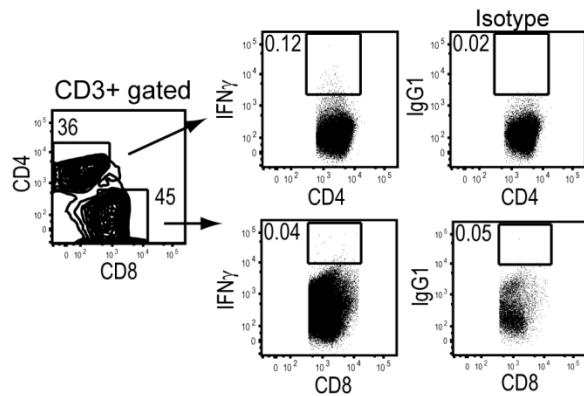

**Figure S1. Gating strategies for T cells in the spleen**

Representative flow plots show gating strategies for distinguishing T cell subsets, tetramer staining, and ICS. All plots represent staining on infected mice. Numbers indicate frequency of parent populations. A) NS4B tetramer staining. Inset histograms show staining of CD44 (bold) on CD3<sup>+</sup>CD8<sup>+</sup>Tetramer<sup>+</sup> populations over isotype (shaded). B) ICS staining on NS4B peptide stimulated splenocytes for IFN $\gamma$ <sup>+</sup>TNF $\alpha$ <sup>+</sup> and TNF $\alpha$ <sup>+</sup> subsets of CD8<sup>+</sup> T cells with respective controls. C) ICS staining on NS4B peptide-stimulated splenocytes for perforin-producing CD8<sup>+</sup> T cells (top) and quantification of perforin-producing CD8<sup>+</sup> T cells at day 7 p.i. (bottom) D) ICS staining on NS3 peptide-stimulated splenocytes for IFN $\gamma$  with respective controls in CD4<sup>+</sup> T cells.

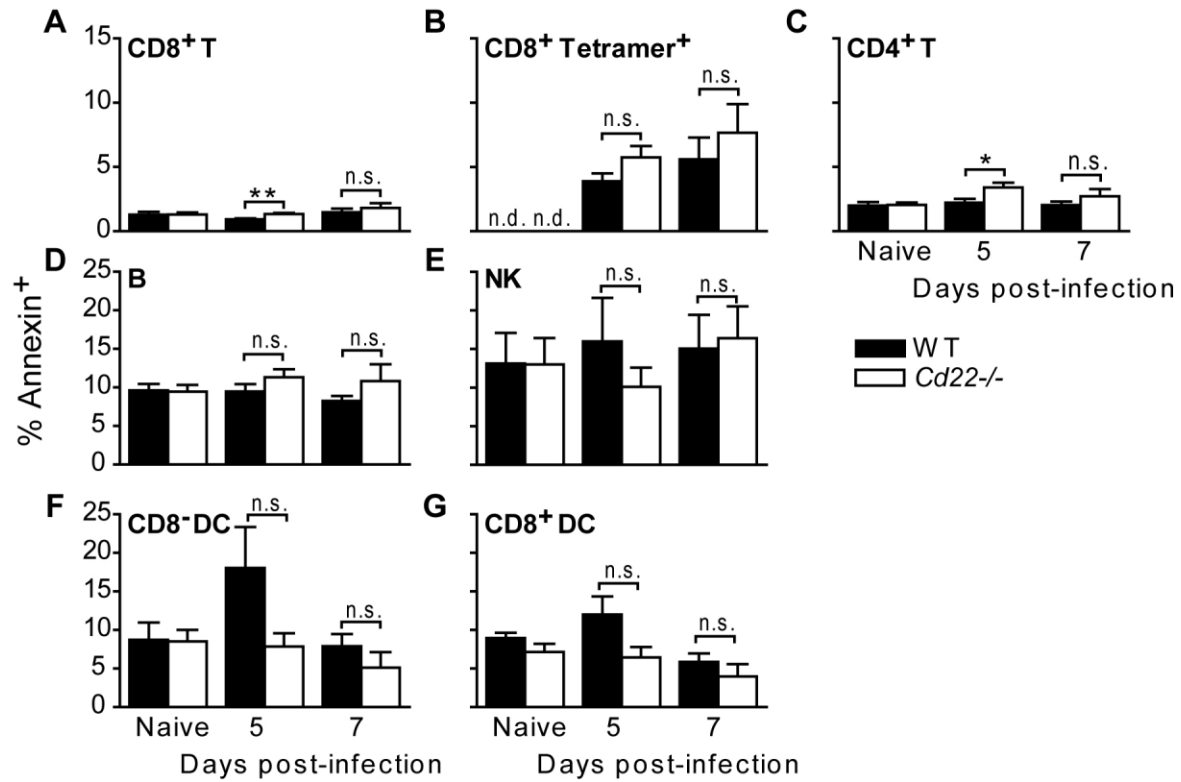

**Figure S2. Annexin V staining of splenocyte populations**

Splenocytes were isolated at various timepoints from WT and *Cd22*<sup>-/-</sup> mice, and stained with surface markers, Annexin V and Live/Dead stain as described in Materials and Methods. Cells were gated on A) total CD8<sup>+</sup> T cells; B) CD8<sup>+</sup>Tetramer<sup>+</sup>; C) total CD4<sup>+</sup> T cells; D) B cells; E) NK cells; F) total CD8<sup>-</sup> DCs; G) CD8<sup>+</sup> DCs. Bar graphs show the frequency of Annexin<sup>+</sup>Live/Dead<sup>-</sup> cells. Data are from three independent experiments with 3-4 mice per timepoint per group. Statistics were performed using a Student's t-test where \*p<0.05, \*\*p<0.01 and n.s. = not significant; n.d. = not detected.

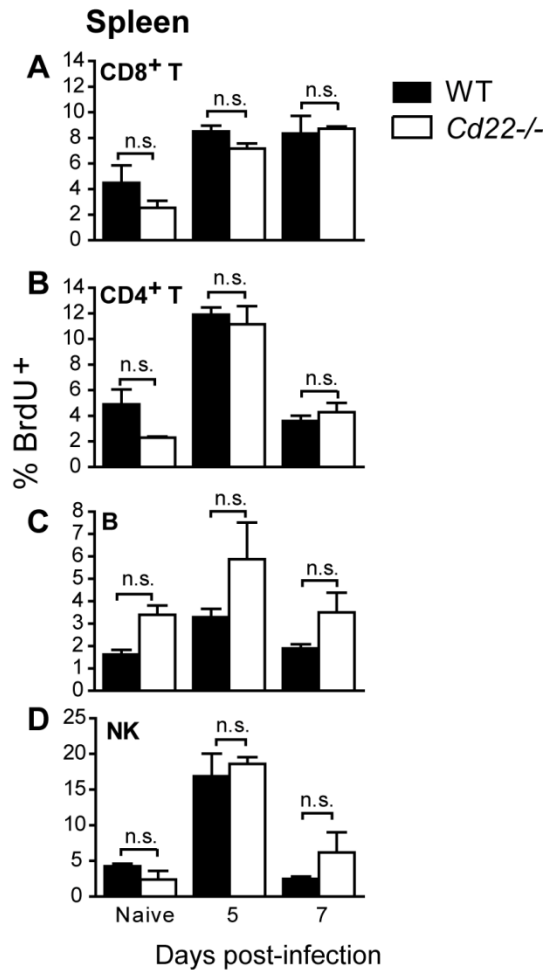

**Figure S3. BrdU incorporation in splenic lymphocyte populations**

WT and *Cd22*<sup>-/-</sup> mice were inoculated s.c. with 10<sup>3</sup> PFU as described. 24 hours prior to tissue harvest at indicated timepoints, mice were given one dose of 1 mg BrdU by i.p. injection. Spleens were harvested as described, and surface stained for A) CD8<sup>+</sup> T cells, B) CD4<sup>+</sup> T cells, C) B cells and D) NK cells prior to ICS to detect BrdU incorporation. Data show one representative of three independent experiments with at least three mice per group. Statistics were performed using a Student's t-test where n.s. = not significant.

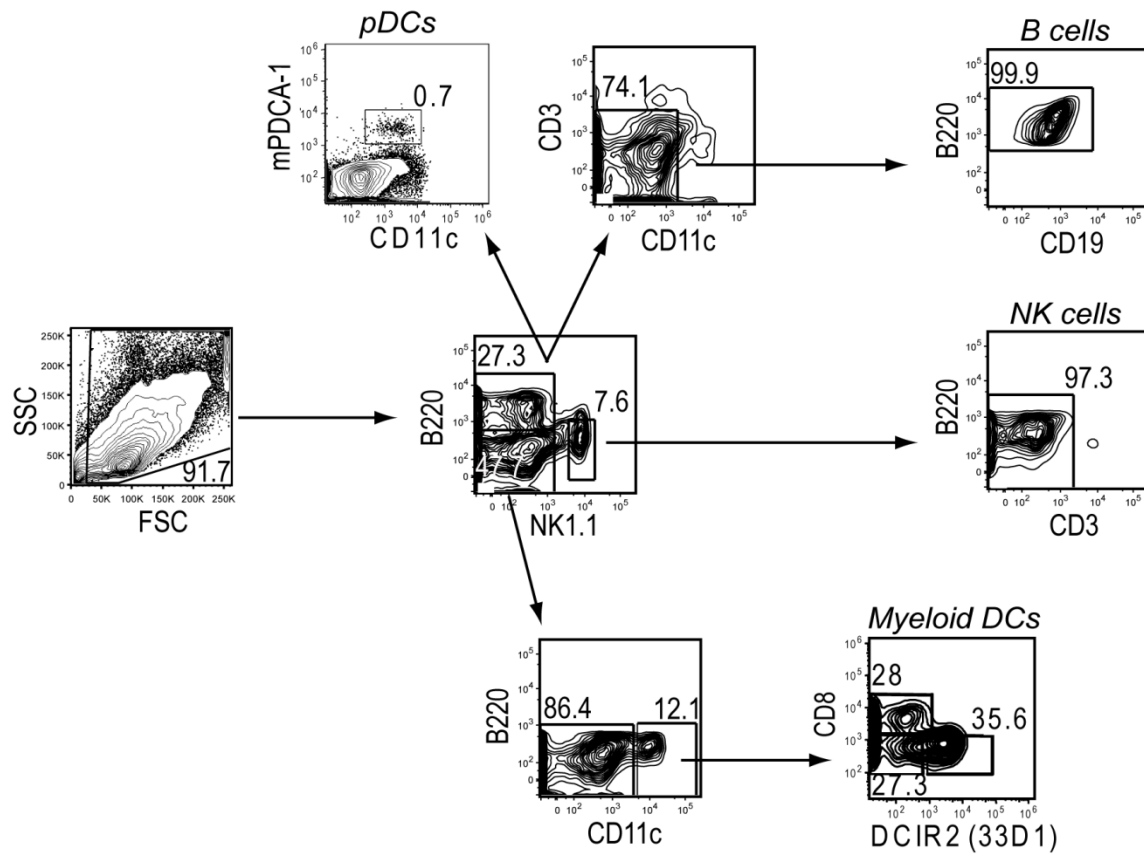

**Figure S4. Gating strategy for B cells, pDCs, NK cells and myeloid DC subsets in the spleen**

Representative plots showing gating strategy for various cell types in the spleen. Numbers show frequency of parent populations.
